# Supplementary material for: First-principles Investigations of Magnetic Semiconductors: An example of Transition Metal Decorated Two-dimensional SnS Monolayer
Source: MDPI journal article supplement (doi:10.3390/nano8100789), 2018-10-04
Supplement: s1 [file s1]

# First-principles Investigations of Magnetic Semiconductors: An example of Transition Metal Decorated Two-dimensional SnS Monolayer

Fangfang Wang <sup>1,2</sup>, Liyu Zhou<sup>1</sup>, Zhen Ma <sup>1</sup>, Mingxue He <sup>1</sup>, Fang Wu <sup>1,\*</sup>, Yunfei Liu <sup>1</sup>

<sup>1</sup> College of Information Science and Technology, Nanjing Forestry University, Nanjing 210037, People's Republic of China;

<sup>2</sup> Institution of Energy and Microstructure, Nanjing University of Science and Technology, Nanjing 210094, People's Republic of China;

\* Correspondence: fangwu@mail.ustc.edu.cn (F. W.)

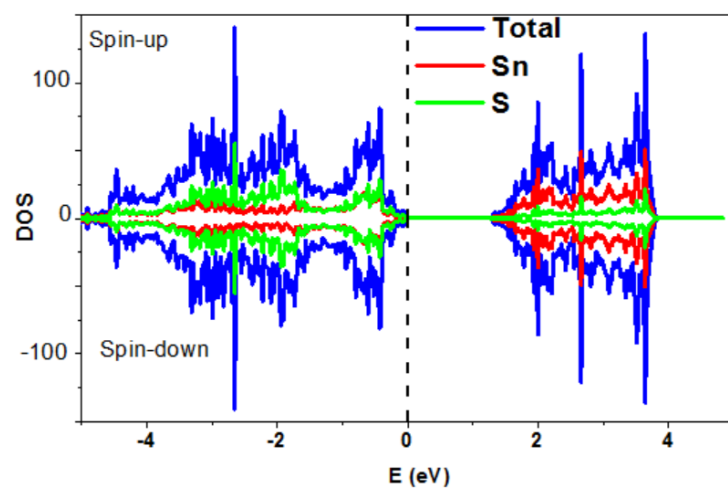

**Figure S1.** The calculated spin-resolved density of states of 2D SnS monolayer.

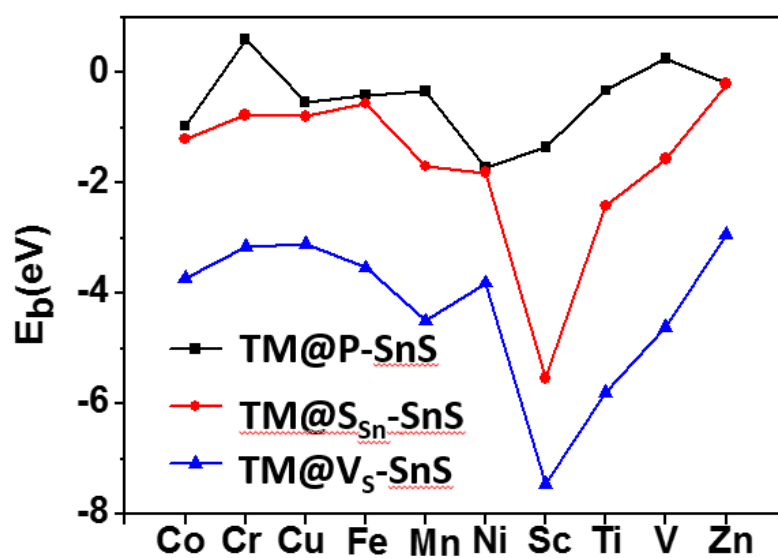

**Figure S2.** The calculated binding energy for each TM atom in 2D SnS monolayer.
